# Supplementary material for: Association between Serum Magnesium and all-cause mortality in patients with Sepsis-associated liver injury: A Cohort Study
Source: Research Square preprint supplement (doi:10.21203/rs.3.rs-6408181/v1), 2025-05-06
Supplement: Supplementary file 1 [file 0a1f8c54af04a009d4cfa0f3.docx]

Supplementary Table 3 Cox inflection point analysis for in-hospital mortality.

| Item | Breakpoint.HR (95%CI) | P |
| --- | --- | --- |
| E_BK1 | 1.838 (1.779 ,1.896) |  |
| slope1 | 1.691 (0.742,3.853) | 0.2109 |
| slope2 | 1.215 (0.924,1.597) | 0.1635 |
| Likelihood Ratio test |  | 0.091 |
| Non-linear Test*1 |  | 0.009 |
| Non-linear Test*2 |  | 0.047 |
