# Supplementary material for: Association between Serum Magnesium and all-cause mortality in patients with Sepsis-associated liver injury: A Cohort Study
Source: Research Square preprint supplement (doi:10.21203/rs.3.rs-6408181/v1), 2025-05-06
Supplement: Supplementary file 2 [file 9f63d3047906102b09cec9a1.docx]

Supplement Table 2 Multivariate regression analysis before and after multiple imputation.

| Variable | Before multiple imputation | | | |  | After multiple imputation | | | |
| --- | --- | --- | --- | --- | --- | --- | --- | --- | --- |
| Crude | | Adjusted | |  | Crude | | Adjusted | |
| HR(95%CI) | P | HR(95%CI) | P |  | HR(95%CI) | P | HR(95%CI) | P |
| Magnesium | 1.41 (1.2~1.66) | <0.001 | 1.24 (1.04~1.49) | 0.02 |  | 1.41 (1.2~1.66) | <0.001 | 1.58 (1.17~2.13) | 0.003 |
| Gender: Male | 0.91 (0.76~1.09) | 0.324 | 0.83 (0.64~1.08) | 0.174 |  | 0.91 (0.76~1.09) | 0.323 | 1.04 (0.67~1.62) | 0.858 |
| Age(y) | 1.01 (1.01~1.02) | <0.001 | 1.01 (1~1.01) | 0.074 |  | 1.01 (1.01~1.02) | <0.001 | 1.02 (1.01~1.03) | 0.002 |
| Race: White | 1 (0.71~1.43) | 0.982 | 0.79 (0.54~1.17) | 0.244 |  | 1 (0.71~1.43) | 0.982 | 0.49 (0.27~0.87) | 0.015 |
| Race: Other | 1.49 (1.03~2.14) | 0.033 | 1.15 (0.77~1.71) | 0.494 |  | 1.49 (1.03~2.14) | 0.033 | 0.72 (0.39~1.31) | 0.277 |
| BMI (kg/m2) | 1.01 (0.99~1.02) | 0.367 | 0.96 (0.85~1.08) | 0.459 |  | 1.01 (1~1.02) | 0.18 | 0.98 (0.82~1.18) | 0.861 |
| Height(m) | 0.99 (0.98~1) | 0.185 | 0.98 (0.94~1.03) | 0.511 |  | 0.99 (0.98~1) | 0.244 | 0.99 (0.92~1.06) | 0.674 |
| Weight(kg) | 1 (1~1) | 0.711 | 1.02 (0.98~1.06) | 0.375 |  | 1 (1~1) | 0.666 | 1.01 (0.95~1.08) | 0.668 |
| Albumin(g/dL) | 0.68 (0.59~0.8) | <0.001 | 0.91 (0.75~1.09) | 0.312 |  | 0.63 (0.54~0.73) | <0.001 | 0.97 (0.75~1.24) | 0.78 |
| HR(bpm) | 1.01 (1.01~1.01) | <0.001 | 1 (1~1.01) | 0.042 |  | 1.01 (1.01~1.01) | <0.001 | 1.01 (1~1.02) | 0.008 |
| SBP (mmHg) | 0.98 (0.97~0.98) | <0.001 | 1 (1~1.01) | 0.394 |  | 0.98 (0.97~0.98) | <0.001 | 1.01 (0.99~1.02) | 0.338 |
| DBP (mmHg) | 0.97 (0.96~0.98) | <0.001 | 0.99 (0.98~1) | 0.225 |  | 0.97 (0.96~0.98) | <0.001 | 0.98 (0.96~1) | 0.036 |
| MAP (mmHg) | 0.98 (0.97~0.98) | <0.001 | 0.99 (0.98~1) | 0.114 |  | 0.98 (0.97~0.98) | <0.001 | 0.99 (0.98~1.01) | 0.445 |
| RR(bpm) | 1.03 (1.02~1.04) | <0.001 | 1.01 (1~1.03) | 0.06 |  | 1.03 (1.02~1.04) | <0.001 | 0.99 (0.96~1.02) | 0.4 |
| Temperature (℃) | 0.91 (0.82~1.02) | 0.095 | 0.99 (0.88~1.11) | 0.806 |  | 0.89 (0.8~0.99) | 0.04 | 1 (0.85~1.17) | 0.987 |
| SPO2(%) | 0.98 (0.97~0.98) | <0.001 | 1 (0.99~1.01) | 0.896 |  | 0.98 (0.97~0.98) | <0.001 | 1 (0.99~1.01) | 0.903 |
| Hemoglobin(g/dL) | 0.91 (0.88~0.95) | <0.001 | 1.01 (0.96~1.06) | 0.674 |  | 0.91 (0.88~0.95) | <0.001 | 1.02 (0.94~1.09) | 0.693 |
| Platelets(109) | 1 (1~1) | <0.001 | 1 (1~1) | 0.055 |  | 1 (1~1) | <0.001 | 1 (1~1) | 0.443 |
| WBC(109) | 1 (1~1) | 0.513 | 1 (0.99~1) | 0.503 |  | 1 (1~1) | 0.512 | 1.01 (1~1.02) | 0.014 |
| PTT (s) | 1.01 (1~1.01) | <0.001 | 1 (1~1.01) | 0.004 |  | 1.01 (1~1.01) | <0.001 | 1.01 (1~1.01) | <0.001 |
| INR | 1.08 (1.05~1.11) | <0.001 | 1.06 (1.03~1.1) | 0.001 |  | 1.08 (1.05~1.11) | <0.001 | 1.04 (0.99~1.1) | 0.116 |
| T-bil(u mol/L) | 1.02 (1.02~1.03) | <0.001 | 1.01 (1~1.02) | 0.018 |  | 1.02 (1.02~1.03) | <0.001 | 1.01 (0.99~1.03) | 0.209 |
| ALT (U/L) | 1 (1~1) | 0.067 | 1 (1~1) | 0.121 |  | 1 (1~1) | 0.027 | 1 (1~1) | 0.005 |
| AST (U/L) | 1 (1~1) | 0.724 | 1 (1~1) | 0.385 |  | 1 (1~1) | 0.927 | 1 (1~1) | 0.038 |
| Lactate (mmol/L) | 1.14 (1.11~1.16) | <0.001 | 1.08 (1.04~1.12) | <0.001 |  | 1.13 (1.11~1.15) | <0.001 | 1.14 (1.08~1.19) | <0.001 |
| pH | 0.04 (0.02~0.08) | <0.001 | 0.66 (0.19~2.27) | 0.512 |  | 0.06 (0.03~0.11) | <0.001 | 2.15 (0.31~14.81) | 0.437 |
| PO2 (mmHg) | 0.99 (0.99~1) | <0.001 | 1 (0.99~1) | 0.262 |  | 0.99 (0.99~1) | <0.001 | 1 (0.99~1) | 0.123 |
| PCO2 (mmHg) | 1.01 (1~1.01) | 0.097 | 0.99 (0.98~1) | 0.154 |  | 1 (1~1.01) | 0.559 | 0.98 (0.97~1) | 0.048 |
| Sodium (m Eq/L) | 1 (0.98~1.02) | 0.984 | 1 (0.99~1.02) | 0.743 |  | 1 (0.98~1.02) | 0.984 | 1.02 (0.99~1.04) | 0.232 |
| Potassium (m Eq/L) | 1.22 (1.11~1.34) | <0.001 | 1.07 (0.95~1.21) | 0.27 |  | 1.22 (1.11~1.34) | <0.001 | 0.96 (0.8~1.15) | 0.64 |
| Calcium(mg/dL) | 0.88 (0.81~0.96) | 0.004 | 0.97 (0.87~1.08) | 0.558 |  | 0.88 (0.81~0.97) | 0.006 | 0.88 (0.74~1.04) | 0.137 |
| Glucose (mg/dL) | 1 (1~1) | 0.05 | 1 (1~1) | 0.101 |  | 1 (1~1) | 0.051 | 1 (1~1) | 0.017 |
| VIS | 1 (1~1) | <0.001 | 1 (1~1) | 0.003 |  | 1 (1~1) | <0.001 | 1 (1~1.01) | 0.002 |
| Vaso agent | 3.27 (2.62~4.08) | <0.001 | 1.9 (1.45~2.5) | <0.001 |  | 3.27 (2.62~4.08) | <0.001 | 1.2 (0.72~1.99) | 0.479 |
| CRRT | 2.85 (2.37~3.42) | <0.001 | 1.47 (1.17~1.86) | 0.001 |  | 2.85 (2.37~3.42) | <0.001 | 1.61 (1.12~2.3) | 0.01 |
| MV | 1.6 (1.33~1.92) | <0.001 | 0.95 (0.76~1.21) | 0.696 |  | 1.6 (1.33~1.92) | <0.001 | 0.91 (0.61~1.38) | 0.664 |
| Magnesium Sulfate | 1.36 (1.14~1.63) | 0.001 | 0.63 (0.5~0.8) | <0.001 |  | 1.36 (1.14~1.63) | 0.001 | 0.74 (0.52~1.06) | 0.097 |
| Calcium Supplement | 1.07 (0.88~1.31) | 0.506 | 1.12 (0.9~1.38) | 0.306 |  | 1.07 (0.88~1.31) | 0.506 | 1.13 (0.81~1.59) | 0.47 |
| Diabetic | 0.91 (0.74~1.11) | 0.334 | 0.68 (0.54~0.86) | 0.002 |  | 0.91 (0.74~1.11) | 0.334 | 0.82 (0.55~1.23) | 0.338 |
| Myocardial infarct | 1.79 (1.45~2.19) | <0.001 | 1.55 (1.22~1.97) | <0.001 |  | 1.79 (1.45~2.19) | <0.001 | 1.45 (0.98~2.15) | 0.064 |
| Congestive Heart Failure | 1.08 (0.89~1.3) | 0.443 | 0.66 (0.52~0.84) | 0.001 |  | 1.08 (0.89~1.3) | 0.443 | 0.94 (0.64~1.38) | 0.763 |
| Chronic Pulmonary Disease | 1.23 (1~1.5) | 0.05 | 1.01 (0.81~1.27) | 0.92 |  | 1.23 (1~1.5) | 0.049 | 1.13 (0.78~1.63) | 0.523 |
| Renal Disease | 1.16 (0.94~1.43) | 0.176 | 0.63 (0.48~0.81) | 0.001 |  | 1.16 (0.94~1.43) | 0.175 | 0.68 (0.43~1.07) | 0.092 |
| Charlson Comorbidity Index | 1.13 (1.1~1.17) | <0.001 | 1.16 (1.1~1.22) | <0.001 |  | 1.13 (1.1~1.17) | <0.001 | 1.06 (0.97~1.16) | 0.2 |

Abbreviations: BMI Body mass index; HR heart rate; SBP systolic blood pressure; DBP Diastolic blood pressure; MAP mean arterial pressure; RR Respiratory rate; SpO2 Peripheral capillary oxygen saturation; WBC white blood cell counts; BUN blood urine nitrogen; PT Prothrombin time; PTT Activated partial thromboplastin time; INR International normalized ratio; T-bil Bilirubin total; ALT Alanine transaminase; AST Aspartate Transaminase; ALP Alkaline phosphatase; CRRT Continuous renal replacement therapy; MV Mechanical ventilation; VIS The vasoactive-inotropic score was calculated as follows: dopamine dose (in micrograms per kilogram per minute) + dobutamine dose (in micrograms per kilogram per minute) + 100 × epinephrine dose (in micrograms per kilogram per minute) + 10 × milrinone dose (in micrograms per kilogram per minute) + 10000 × vasopressin dose (in international units per kilogram per minute) + 100 × norepinephrine dose (in micrograms per kilogram per minute).
