# Supplementary material for: Association between Serum Magnesium and all-cause mortality in patients with Sepsis-associated liver injury: A Cohort Study
Source: Research Square preprint supplement (doi:10.21203/rs.3.rs-6408181/v1), 2025-05-06
Supplement: Supplementary file 3 [file b1ced2028cecabcab3a149de.docx]

Supplementary table 3 Univariate cox analysis between serum magnesium level and in-hospital mortality.

| Item | HR(95%CI) | P |
| --- | --- | --- |
| Magnesium | 1.41 (1.2,1.66) | < 0.001 |
| Male | 0.91 (0.76,1.09) | 0.323 |
| Age(y) | 1.01 (1.01,1.02) | < 0.001 |
| Ethnicity |  |  |
| White | 1.0041 (0.706,1.4282) | 0.982 |
| Other | 1.49 (1.03,2.14) | 0.033 |
| BMI (kg/m2) | 1.0035 (0.9924,1.0148) | 0.54 |
| Anchor Year Group |  |  |
| 2011-2013 | 1.09 (0.85,1.41) | 0.479 |
| 2014-2016 | 1.12 (0.88,1.44) | 0.36 |
| 2017-2019 | 1.23 (0.95,1.58) | 0.115 |
| Care Unit |  |  |
| MICU | 1.15 (0.91,1.44) | 0.236 |
| SICU | 0.86 (0.66,1.12) | 0.267 |
| Other ICU | 0.37 (0.23,0.6) | < 0.001 |
| HR (bpm) | 1.0091 (1.0052,1.013) | < 0.001 |
| SBP (mmHg) | 0.98 (0.97,0.98) | < 0.001 |
| DBP (mmHg) | 0.97 (0.96,0.98) | < 0.001 |
| MAP (mmHg) | 0.98 (0.97,0.98) | < 0.001 |
| RR (bpm) | 1.03 (1.02,1.04) | < 0.001 |
| Temperature (℃) | 0.93 (0.83,1.03) | 0.148 |
| SPO2 (%) | 0.98 (0.97,0.98) | < 0.001 |
| Hemoglobin (g/dL) | 0.91 (0.88,0.95) | < 0.001 |
| Platelets (109) | 0.997 (0.9958,0.9982) | < 0.001 |
| WBC (109) | 1.0013 (0.9976,1.005) | 0.489 |
| Albumin (g/dL) | 0.68 (0.6,0.77) | < 0.001 |
| BUN (mg/dL) | 1.01 (1.01,1.01) | < 0.001 |
| Creatinine (u mol/L) | 1.16 (1.11,1.21) | < 0.001 |
| PTT (s) | 1.0071 (1.0049,1.0093) | < 0.001 |
| INR | 1.08 (1.05,1.11) | < 0.001 |
| T-bil (u mol/L) | 1.02 (1.02,1.03) | < 0.001 |
| ALT (U/L) | 0.9999 (0.9999,1) | 0.02 |
| AST (U/L) | 1 (1,1) | 0.99 |
| Lactate (mmol/L) | 1.14 (1.11,1.16) | < 0.001 |
| pH | 0.05 (0.03,0.09) | < 0.001 |
| PO2 (mmHg) | 0.9926 (0.9898,0.9954) | < 0.001 |
| PCO2 (mmHg) | 1.005 (0.9987,1.0114) | 0.121 |
| Sodium (m Eq/L) | 1.0002 (0.9847,1.0159) | 0.984 |
| Potassium (m Eq/L) | 1.22 (1.11,1.34) | < 0.001 |
| Calcium (mg/dL) | 0.88 (0.8,0.95) | 0.002 |
| Glucose (mg/dL) | 1.0012 (1,1.0023) | 0.047 |
| VIS | 1.004 (1.0031,1.0049) | < 0.001 |
| Vaso-agent | 3.27 (2.62,4.08) | < 0.001 |
| CRRT | 2.85 (2.37,3.42) | < 0.001 |
| MV | 1.6 (1.33,1.92) | < 0.001 |
| Magnesium Sulfate | 1.36 (1.14,1.63) | < 0.001 |
| Calcium Supplement | 1.07 (0.88,1.31) | 0.506 |
| Diabetic | 0.91 (0.74,1.11) | 0.334 |
| Myocardial infarct | 1.79 (1.45,2.19) | < 0.001 |
| Congestive Heart Failure | 1.08 (0.89,1.3) | 0.443 |
| Chronic Pulmonary Disease | 1.23 (1,1.5) | 0.049 |
| Renal Disease | 1.16 (0.94,1.43) | 0.175 |
| Charlson Comorbidity Index | 1.13 (1.1,1.17) | < 0.001 |
| APS III | 1.02 (1.02,1.03) | < 0.001 |
| SAPS II | 1.04 (1.03,1.04) | < 0.001 |
| OASIS | 1.06 (1.05,1.07) | < 0.001 |
| Sofa score | 1.15 (1.13,1.17) | < 0.001 |
| Bacteremia | 0.54 (0.35,0.83) | 0.005 |
| Abdoal Infection | 1.07 (0.79,1.43) | 0.668 |
| Pneumonia | 1.0066 (0.8346,1.2139) | 0.945 |
| Skin and tissue infection | 0.74 (0.41,1.35) | 0.331 |
| Urinary tract infection | 0.65 (0.51,0.82) | < 0.001 |

Abbreviations: Q1 <0.8 (n = 308); Q2 0.8,1.8 (n = 370); Q3 1.8,2.1(n = 323); Q4 >=2.1 (n = 366)

BMI Body mass index; HR heart rate; SBP systolic blood pressure; DBP Diastolic blood pressure; MAP mean arterial pressure; RR Respiratory rate; SpO2 Peripheral capillary oxygen saturation; WBC white blood cell counts; BUN blood urine nitrogen; PT Prothrombin time; PTT Activated partial thromboplastin time; INR International normalized ratio; T-bil Bilirubin total; ALT Alanine transaminase; AST Aspartate Transaminase; ALP Alkaline phosphatase; SAPS II Simplified Acute Physiology Score II; SOFA Sequential Organ Failure Assessment, AI Abdominal Infection; UTI Urinarytractinfection; SSTI Skin and soft tissues infection；CRRT Continuous renal replacement therapy; MV Mechanical ventilation; VIS The vasoactive-inotropic score was calculated as follows: dopamine dose (in micrograms per kilogram per minute) + dobutamine dose (in micrograms per kilogram per minute) + 100 × epinephrine dose (in micrograms per kilogram per minute) + 10 × milrinone dose (in micrograms per kilogram per minute) + 10000 × vasopressin dose (in international units per kilogram per minute) + 100 × norepinephrine dose (in micrograms per kilogram per minute).
