# Supplementary material for: Association between Serum Magnesium and all-cause mortality in patients with Sepsis-associated liver injury: A Cohort Study
Source: Research Square preprint supplement (doi:10.21203/rs.3.rs-6408181/v1), 2025-05-06
Supplement: Supplementary file 4 [file c9fd211ae01b6cf163048a92.docx]

Supplement Table 1 Percentage of missing data.

| Variable | Missing count | Missing rate (%) |
| --- | --- | --- |
| Albumin (g/dL) | 445 | 32.553 |
| BMI(kg/m2) | 424 | 31.0168 |
| Height(m) | 422 | 30.8705 |
| Lactate(mmol/L) | 342 | 25.0183 |
| PCO2(mmHg) | 296 | 21.6533 |
| pH | 296 | 21.6533 |
| PO2(mmHg) | 296 | 21.6533 |
| ALP(U/L) | 157 | 11.485 |
| ALT(U/L) | 156 | 11.4119 |
| AST(U/L) | 155 | 11.3387 |
| Temperature (℃) | 93 | 6.8032 |
| Weight(kg) | 27 | 1.9751 |
| Calcium (mg/dL) | 26 | 1.902 |
| PTT(s) | 23 | 1.6825 |
| PT(s) | 20 | 1.4631 |
| DBP(mmHg) | 14 | 1.0241 |
| SBP(mmHg) | 13 | 0.951 |
| Resp Rate(bpm) | 8 | 0.5852 |
| Heart Rate(bpm) | 7 | 0.5121 |
| MAP(mmHg) | 7 | 0.5121 |
| SPO2(%) | 7 | 0.5121 |
| Glucose(mg/dL) | 4 | 0.2926 |
| Hemoglobin (g/dL) | 3 | 0.2195 |
| WBC(109) | 2 | 0.1463 |
| Platelets(109) | 1 | 0.0732 |

Abbreviations: BMI Body mass index; HR heart rate; SBP systolic blood pressure; DBP Diastolic blood pressure; MAP mean arterial pressure; RR Respiratory rate; SpO2 Peripheral capillary oxygen saturation; WBC white blood cell counts; BUN blood urine nitrogen; PT Prothrombin time; PTT Activated partial thromboplastin time; ALT Alanine transaminase; AST Aspartate Transaminase; ALP Alkaline phosphatase;
